1  
2  
3  
4  
5  
6  
7  
8  
9  
10  
11  
12  
13  
14  
15  
16  
17  
18  
19  
20  
21  
22  
23  
24  
25  
26  
27  
28  
29  
30  
31  
32  
33  
34  
35  
36  
37  
38

## Single-nuclei RNA-sequencing of plants

Daniele Y. Sunaga-Franze<sup>1,#</sup>, Jose M. Muino<sup>2,#</sup>, Caroline Braeuning<sup>1,#</sup>, Xiaocai Xu<sup>3,#</sup>, Minglei Zong<sup>3</sup>, Cezary Smaczniak<sup>3</sup>, Wenhao Yan<sup>3</sup>, Cornelius Fischer<sup>1</sup>, Ramon Vidal<sup>1</sup>, Magdalena Kliem<sup>1</sup>, Kerstin Kaufmann<sup>3,\*</sup>, Sascha Sauer<sup>1,\*</sup>

<sup>1</sup> Max Delbrück Center for Molecular Medicine/Berlin Institute of Health, Berlin, Germany

<sup>2</sup> Humboldt-Universität zu Berlin, Institute of Biology, Systems Biology of Gene Regulation, Berlin, Germany

<sup>3</sup> Humboldt-Universität zu Berlin, Institute of Biology, Plant Cell and Molecular Biology, Berlin, Germany

\*Correspondence to: [kerstin.kaufmann@hu-berlin.de](mailto:kerstin.kaufmann@hu-berlin.de), [sascha.sauer@mdc-berlin.de](mailto:sascha.sauer@mdc-berlin.de)

**Abstract**

39 Single-cell genomics has slowly advanced in plant research. Here, we introduce a generic  
40 procedure for plant nuclei isolation and nanowell-based library preparation for short-read  
41 sequencing. This plant-nuclei sequencing (PN-seq) method allows for analyzing several  
42 thousands of genes in thousands of individual plant cells. In this way, we expand the toolset for  
43 single-cell genomics in the field of plant biology to generate plant transcriptome atlases in  
44 development and environmental response.

45

## 46 **Introduction**

47 The fundamental units of life, the cells, can vary tremendously within an organism. The analysis  
48 of specialized cells and their interactions is essential for a comprehensive understanding of the  
49 function of tissues and biological systems in general. Major biological roles such as growth,  
50 development and physiology ultimately gain plasticity from heterogeneity in cellular gene  
51 expression <sup>1</sup>.

52 Without precise transcriptional maps of different cell populations, we cannot accurately  
53 describe all their functions and underlying molecular networks that drive their activities. Recent  
54 advances in single-cell (sc) and in particular single-nucleus (sn) RNA-sequencing have put  
55 comprehensive, high-resolution reference transcriptome maps of mammalian cells and tissues  
56 on the agenda of international consortia such as the Human Cell Atlas <sup>2</sup>.

57 Similar efforts have been made by the Plant Cell Atlas <sup>3</sup>. Plant tissues and plant cells pose  
58 specific challenges compared to mammalian systems <sup>4</sup>. Plant cells are immobilized in a rigid  
59 cell wall matrix, which is required to be removed for isolating single cells. Additional technical  
60 demands include size variability of plant cells, and the presence of plastids and vacuoles.  
61 Consequently, these characteristics require considerably different operational procedures  
62 compared with mammalian tissues.

63 Recently, plant single-cell RNA-sequencing studies using protoplast isolation (PI) have been  
64 published <sup>5,6,7,8,9</sup>. However, it is known that enzymatic digestion of plant cell walls is an  
65 important stressor for the plant and thus can introduce artifacts at the transcriptome level. PI-  
66 response genes can be identified through an independent bulk RNA-seq experiment to eliminate  
67 at least the most strongly affected genes from a scRNA-seq <sup>9</sup>, as is shown in the Supplementary  
68 Fig. 1. In summary, there is an urgent need for alternative efficient single-cell genomics  
69 methods tailored for plant research.

70 Here, we introduce a single-nucleus sequencing protocol for plants (Fig. 1a; full protocol in  
71 Supplementary Materials and Methods). Working with nuclei has the advantage to eliminate  
72 organelles and vacuoles, as well as secondary metabolites localized in the cytoplasm that can

73 interact with RNA. SnRNA-seq experiments have specific challenges, such as lower RNA  
74 yield, that need to be overcome by optimized experimental procedures and data analysis  
75 strategies<sup>10,11,12,13</sup>. As yet, there is no report of snRNA-seq methodology in plants.

76

## 77 **Results and Discussion**

### 78 Preparation of plant tissue and nuclei

79 Here we propose a single-nucleus sequencing strategy to detect nucleic acids derived from  
80 individual plant cells. The key step of our plant-nuclei sequencing (PN-seq) procedure consists  
81 of gentle but efficient isolation of plant nuclei. Plant tissue was frozen, gently physically  
82 dissociated and transferred to sucrose-rich, protease and RNase inhibitor containing Honda  
83 buffer to support cell lysis. Cell walls and cell membranes were mechanically disrupted using  
84 a gentleMACS Dissociator, keeping the nuclei largely intact as detected by microscopy  
85 (Supplementary Fig. 2a, Materials and Methods). Finally, released intact plant nuclei were  
86 collected using Fluorescence Activated Cell Sorting (FACS), as demonstrated for a variety of  
87 samples including complex seedlings of the model plant *Arabidopsis thaliana*, as well as  
88 flowers of *Arabidopsis thaliana*, *Petunia hybrida* and *Antirrhinum majus* (snapdragon) and  
89 flowers and leaves from *Solanum lycopersicum* (tomato) (Fig. 1b and Supplementary Fig. 2b  
90 and c). The RNA that was isolated from nuclei was of higher quality than RNA that was  
91 conventionally purified from plant tissue, as observed by chromatography analysis  
92 (Supplementary Fig. 2d).

93

### 94 Plant-nuclei (PN) sequencing of *Arabidopsis thaliana* seedlings

95 The next step consists of generating high quality cDNA libraries from the isolated nuclei. In  
96 principle, a number of library preparation and sequencing procedures can be combined. Of note,  
97 nuclei from *Arabidopsis thaliana* (~2  $\mu\text{m}$  diameter) are much smaller than typical human or  
98 mouse nuclei (~10  $\mu\text{m}$  diameter), and may contain only a fraction of the average mammalian  
99 nuclei RNA amount. We thus opted for a sensitive nanowell-based approach that includes lysis  
100 of nuclei by detergents and a freeze-thaw-cycle. In microdroplet-based single-cell RNA-  
101 sequencing methods such as the popular commercial 10x Genomics Chromium procedures,  
102 only a relatively mild lysis by detergents can be applied, since reverse transcription (RT)  
103 reactions take place in the same environment. Moreover, nanowells allow for selection of  
104 single-nucleus-containing wells and exclusion of no-nucleus- and multiple-nuclei-wells,  
105 thereby introducing additional quality control (Supplementary Materials and Methods). Using  
106 SMARTer ICELL8 3' chemistry, we prepared DNA libraries for short paired-end sequencing.

107 Raw sequencing data were preprocessed with ICELL8 mappa analysis pipeline and the R  
108 package Seurat v3 was used for downstream analysis <sup>14</sup>. Global properties of single-nuclei  
109 RNA-sequencing libraries including the number of sequenced, barcoded and mapped reads  
110 were summarized using hanta software from ICELL8 mappa analysis pipeline (Supplementary  
111 Data 1).

112 To validate our method, we set up our protocol using pools of *Arabidopsis thaliana* seedlings  
113 (3 biological replicates), which feature diverse plant structures comprising the radicle  
114 (embryonic root), the hypocotyl (embryonic shoot), and the cotyledons (seed leaves). On  
115 average, we obtained 1,116 nuclei per replicate and 2,802 genes per nucleus at ~220,000 reads  
116 per nucleus from these complex samples (Supplementary Data 1, Supplementary Fig. 3).  
117 Previous studies using PI of much less complex roots and droplet-based scRNA-seq obtained  
118 on average of 2,300 cells and the median number of 4,300 genes per cell <sup>9</sup>. As expected, the  
119 lower number of expressed genes per nuclei found by PN-seq can be explained by the fact that  
120 plant nuclei were small (~2  $\mu\text{m}$  diameter) and thus contained less RNA. The ICELL8 system  
121 provides power for unbiased isolation of up to 1,800 single cells on a single chip, which can be  
122 upscaled by denser and/or bigger nanowell formats. As shown below, we achieved a reasonable  
123 number to perform further biology analysis, indicating the potential of PN-seq as a broadly  
124 applicable method.

125 Next, we analyzed the reproducibility of PN-seq. Correlation between the replicates was  
126 assessed using MA plots and Pearson's correlation, which ranged between 0.90 and 0.91  
127 (Supplementary Fig. 4a-b). In silico pooling of our PN-seq data and subsequent correlation with  
128 gene expression data derived from conventional bulk RNA-sequencing resulted in Pearson  
129 correlation of 0.74 (Supplementary Fig. 4c, Supplementary Materials and Methods). This  
130 correlation is consistent with correlation coefficients found in previous publications (ranging  
131 from 0.7 to 0.85) <sup>15</sup> and therefore we found good agreement between both experiments. As  
132 shown in Supplementary Fig. 5, gene expression differences between both experiments were  
133 similar across all the chromosomes. No bias versus expression of specific sets of genes was  
134 observed.

135

### 136 Main organs and cell types of seedlings

137 The three seedling replicates were subsequently assessed using Seurat integration analysis,  
138 which initially revealed 13 distinct nuclei clusters (n=2,871) (Supplementary Fig. 6a,  
139 Supplementary Materials and Methods). Similar distribution of nuclei across clusters was  
140 observed, indicating that highly similar nuclei populations were recovered in each biological

141 replicate (Fig. 1c-d). The Wilcoxon rank sum test was applied to identify the significant marker  
142 genes of the clusters (Supplementary Table 1). Annotation of the initial 13 clusters was done  
143 based on the TraVaDB (Transcriptome Variation Analysis Database - <http://travadb.org> <sup>17</sup>,  
144 Supplementary Materials and Methods), a plant gene expression resource, which resulted in 10  
145 cluster labels that could be roughly classified into expected main basic organ types of seedlings:  
146 Leaves/Cotyledons (n=643 nuclei), Shoot meristems (n=180 nuclei), Hypocotyls (n=393  
147 nuclei), Root apices (n=192 nuclei), Vasculature (Leaves/Roots) (n=342 nuclei), Roots (n=267  
148 nuclei), Leaves (n=152 nuclei), Mature roots (n=27 nuclei), Roots/Hypocotyls (n=136 nuclei)  
149 and non-determined nuclei (n=539 nuclei) (Fig. 1e). The heatmap showing the expression of  
150 marker genes recovered from TraVaDB is displayed in Supplementary Fig. 6b. The entire  
151 annotation process is illustrated in Supplementary Fig. 6c. The clusters contain similar numbers  
152 of nuclei from each replicate, corroborating again the reproducibility of the method (Fig. 1f).  
153 Next, we performed in depth analysis of root nuclei using 964 nuclei derived from root tissue  
154 of the seedlings (Root apices = 192 nuclei, Vasculature (Leaves/Roots) = 342 nuclei, Roots =  
155 267 nuclei), Mature roots = 27 nuclei, Roots/Hypocotyls = 136 nuclei). The 964 nuclei were  
156 reorganized into 15 sub-clusters. The marker genes of the predicted 15 sub-clusters were  
157 compared to the list of markers from recently published atlas of the *Arabidopsis* root <sup>5,9</sup>  
158 (Supplementary Table 1, Supplementary Materials and Methods). PN-seq faithfully recovered  
159 major root cell types from our complex seedling dataset: mature, cortex/endodermis, stele,  
160 trichoblast, atrichoblast, endodermis and xylem (Supplementary Fig. 7). When looking at the  
161 expression of those genes in the RNA-seq based TraVa dataset, we notably observed the  
162 clusters 0, 1, 4, 10, 11, 12 and 14, in particular cluster 10 (trichoblast), enriched with multiple  
163 marker genes known from flowers, indicating i) the higher complexity of cell and organ type  
164 of inflorescence data compared to roots, ii) the still poor spatiotemporal resolution currently  
165 available, as TravA dataset is not cell-type specific and iii) the basic principle of the biology in  
166 which a gene may play role in multiple biological processes (Supplementary Table 1).

167

168 High similarity between fixed and unfixed material

169 In order to allow for more technical flexibility, i.e. the possibility to simplify the harvest and  
170 storage of plant samples, we fixed seedlings using methanol prior to our workflow  
171 (Supplementary Materials and Methods). High similarity across the samples from fixed and  
172 unfixed procedures was observed (Supplementary Fig. 8a-c) and the output was similar to the  
173 unfixed procedure: 850 nuclei and 2,292 genes (mean) per nucleus (Supplementary Fig. 3),  
174 implying that fixation of the material does not introduce major differences in the results. The

175 option of PN-seq to process frozen or methanol-fixed materials offers an additional advantage  
176 over protoplast-based procedures, since the latter requires immediate processing of fresh,  
177 unfrozen plant material.

178

179 Developmental flower stages covered by *Arabidopsis thaliana* inflorescences

180 Next, to study cell differentiation in plants, we applied PN-seq to *Arabidopsis thaliana*  
181 inflorescences covering all developmental stages prior to anthesis. After quality control  
182 filtering, we obtained transcriptomes of 856 nuclei with an average number of 2,967 expressed  
183 genes per nucleus (Supplementary Fig. 9a), and with 14,690 genes expressed in at least five  
184 nuclei. The analysis identified 15 clusters corresponding to distinct organs and developmental  
185 stages (Fig. 2a; Supplementary Fig. 9b). In order to annotate these clusters with particular cell  
186 types, we first identified specific marker genes of each cluster (Supplementary Table 1), then  
187 plotted their expression profiles in the different floral organs and developmental stages obtained  
188 from TraVaDB <sup>17</sup> (Fig. 2b). Last, we correlated the gene expression of each cluster with each  
189 TraVaDB sample and indicated these values in the UMAP plot (Supplementary Fig. 9c). A  
190 major proportion of clusters (37% of the nuclei population) were annotated as differentiating  
191 anthers at different developmental stages (clusters 3, 4, 6, 7, 10, 15). This can be explained by  
192 the fact that six anthers per developing flower comprise a large fraction of floral tissues <sup>18,19</sup>.  
193 Furthermore, anthers/pollen express unique genes <sup>18,19</sup> which facilitates the bioinformatic  
194 identification of the clusters. Our data captured the developmental gene expression profiles  
195 during anther/pollen development from undifferentiated stem cells (cluster 0; Fig. 2) to late  
196 anther stages close to organ maturity, prior to anthesis (cluster 3; Fig. 2). Pseudotime analysis  
197 using Monocle 3 showed a strong concordance with anther developmental stages  
198 (Supplementary Fig. 10).

199

200 Regulatory link during anther and pollen development

201 Next, we analyzed how the gene regulatory network dynamically changes during anther and  
202 pollen development. Gene regulatory networks (GRNs) were inferred from transcriptome data  
203 using GENIE3 <sup>20</sup> to estimate the strength of interaction between known transcription factors  
204 (TFs) versus all the expressed genes for each cluster independently (Supplementary Fig. 11).  
205 One of the most connected TFs representing anthers was *ABORTED MICROSPORES (AMS)*.  
206 *AMS* and the related TF genes *bHLH089*, *bHLH090* and *bHLH010* <sup>21,22</sup> were expressed in a  
207 highly dynamic manner (Fig. 2c, 2d). *AMS* target genes at early stages were functionally  
208 enriched in chromatin remodeling (e.g. *BRAHMA*; *SET DOMAIN PROTEIN 16*) and pollen  
209 development (*DIHYDROFLAVONOL 4-REDUCTASE-LIKE1*; *ATP-BINDING CASSETTE*

210 *G26*) (Fig. 2e). Late targets included metabolic enzymes as well as genes associated with RNA-  
211 regulatory processes. Newly identified marker genes covered the full anther developmental  
212 trajectory (Supplementary Fig. 12) and are candidates for further mechanistic analyses.

213 To further validate our clustering analysis, we assessed the expression patterns of genes using  
214 promoter: GFP -NLS reporter lines. We selected genes with significant specificity and  
215 unknown function (Supplementary Fig. 13). In general, all genes showed expression in line  
216 with predictions. Specific expression in the floral meristem was observed for genes  
217 (AT1G63100, AT3G51740) from clusters 11, while genes AT4G11290 selected from cluster  
218 14 showed highly specific stigma tissue expression. AT2G38995 was expressed in the sepals  
219 and petals, as expected for a marker from cluster 8, and it also showed slight expression in  
220 anthers. Genes AT5G20030, AT1G23520 and AT2G16750 were expressed in anthers and  
221 showed stage specificities that correlated with our analysis. Gene AT5G20030 from cluster 15,  
222 which is early anther cluster, showed expression in young anthers from flower 9 to flower 14.  
223 Finally, genes AT1G23520 and AT2G16750 were found in clusters of older anthers and indeed  
224 showed expression in old flowers (from 6-8 and 4-5), respectively.

225 In conclusion, PN-seq allowed for efficiently building transcriptome maps of plant samples and  
226 for studying at the level of individual cells dynamic GRNs during development, and revealed  
227 cell-type and stage-specific TF target pathways in an unprecedented manner.

228

## 229 Conclusion

230 Although it is known that protoplast isolation (PI) procedure can significantly affect the plant  
231 transcriptome, it has been the basic choice for plant single-cell sequencing and had been mostly  
232 applied to roots samples<sup>7,8,9,23,24</sup>. Here, we introduced PN-seq that can be applied to analyze  
233 nucleic acids in bulk or in individual cells. Our new PN-seq methodology - based on efficient  
234 isolation of nuclei - is directly and easily applicable to a broad range of different plant tissues  
235 such as complex seedlings, flowers and leaves, and thus provides a versatile tool for multiple  
236 plant studies. In principle, various library preparation and sequencing methods can be combined  
237 with our nuclei isolation procedure.

238 Nanowell-based library preparation offered the possibility of visual quality control of  
239 individual nuclei, achieved high numbers of several thousand genes per cell and more than  
240 thousand nuclei per run to sensitively detect plant cell (sub)types. The number of nuclei can  
241 potentially be upscaled by using denser and/or larger nanowell-formats to further increase the  
242 number of nuclei for sequence analysis. The here applied nanowell-based approach resulting in  
243 deep cellular transcriptome data was of particular advantage to identify co-regulated genes and

244 decipher gene networks underlying biological processes of interest. Along with the ever  
245 growing arsenal of nucleic acids sequencing technologies and plant genomics reference  
246 databases, single-nuclei genomics procedures are expected to become valuable tools to build  
247 maps of all plant cells of developing and adult tissues, and to measure cell-type specific  
248 differences in environmental responses to gain novel mechanistic insights into plant growth and  
249 physiology<sup>3</sup>.

250

## 251 **Materials and Methods**

### 252 Preparation of plant tissues

253 One gram of *Arabidopsis thaliana* (Col-0) seedlings or 10 inflorescences were collected and  
254 snap-frozen in liquid nitrogen. The same procedure was applied for the following samples: 10  
255 unopened buds of *Petunia hybrida* (W115), 8 unopened buds of *Antirrhinum majus*, 20 fully  
256 developed flowers and 1.3 g leaves of *Solanum lycopersicum*. A step-by-step protocol for the  
257 preparation of plant tissues, nuclei and single-nucleus libraries as well as the steps for the data  
258 pre-processing analysis can be found at Protocol Exchange.

259

### 260 Preparation of nuclei

261 Frozen tissue was carefully crushed to small pieces in liquid nitrogen using a mortar and a pestle  
262 and transferred to a gentleMACS M tube that was filled with 5 ml of Honda buffer (2.5 % Ficoll  
263 400, 5 % Dextran T40, 0.4 M sucrose, 10 mM MgCl<sub>2</sub>, 1 μM DTT, 0.5% Triton X-100, 1  
264 tablet/50mL cOmplete Protease Inhibitor Cocktail, 0.4 U/μl RiboLock, 25 mM Tris-HCl, pH  
265 7.4). The M tubes were put onto a gentleMACS Dissociator and a specific program  
266 (Supplementary Table 3) was run at 4°C to disrupt the tissue and to release nuclei. The resulting  
267 suspension was filtered through a 70 μm strainer and centrifuged at 1000 g for 6 min at 4°C.  
268 The pellet was resuspended carefully in 500 μl Honda buffer, filtered through a 35 μm strainer  
269 and stained with 3x staining buffer (12 μM DAPI, 0.4 U/μl Ambion RNase Inhibitor, 0.2 U/μl  
270 SUPERaseIn RNase Inhibitor in PBS). Nuclei were sorted by gating on the DAPI peaks using  
271 a BD FACS Aria III (200,000 – 400,000 events) into a small volume of landing buffer (4%  
272 BSA in PBS, 2 U/μl Ambion RNase Inhibitor, 1 U/μl SUPERaseIn RNase Inhibitor). Sorted  
273 nuclei were additionally stained with NucBlue from the Invitrogen Ready Probes Cell Viability  
274 Imaging Kit (Blue/Red), then counted and checked for integrity in Neubauer counting  
275 chambers. Quality of RNA derived from sorted nuclei was analyzed by Agilent TapeStation  
276 using RNA ScreenTape or alternatively by Agilent's Bioanalyser 2100 system.

277



278 Preparation of single-nucleus libraries using SMARTer ICELL8 Single-Cell System

279 The NucBlue and DAPI co-stained single-nuclei suspension (60 cells/ $\mu$ L) was distributed to  
280 eight wells of a 384-well source plate (Cat. No. 640018, Takara) and then dispensed into a  
281 barcoded SMARTer ICELL8 3' DE Chip (Cat. No. 640143, Takara) by an ICELL8  
282 MultiSample NanoDispenser (MSND, Takara). Chips were sealed and centrifuged at 500 g for  
283 5 min at 4°C. Nanowells were imaged using the ICELL8 Imaging Station (Takara). After  
284 imaging, the chip was placed in a pre-cooled freezing chamber, and stored at -80 °C for at least  
285 2 h. The CellSelect software was used to support identification of nanowells that contained a  
286 single nucleus. One chip yielded on average between 800 - 1200 nanowells with single nuclei.  
287 These nanowells were selected for subsequent targeted deposition of 50 nL/nanowell RT-PCR  
288 reaction mix from the SMARTer ICELL8 3' DE Reagent Kit (Cat. No. 640167, Takara) using  
289 the MSND. After RT and amplification in a Chip Cycler, barcoded cDNA products from  
290 nanowells were pooled by means of the SMARTer ICELL8 Collection Kit (Cat. No. 640048,  
291 Takara). cDNA was concentrated using the Zymo DNA Clean & Concentrator kit (Cat. No.  
292 D4013, Zymo Research) and purified with AMPure XP beads. Afterwards, cDNA was used to  
293 construct Nextera XT (Illumina) DNA libraries followed by AMPure XP bead purification.  
294 Qubit dsDNA HS Assay Kit, KAPA Library Quantification Kit for Illumina Platforms and  
295 Agilent High Sensitivity D1000 ScreenTape Assay were used for library quantification and  
296 quality assessment. Strand-specific RNA libraries for sequencing were prepared with TruSeq  
297 Cluster Kit v3 and sequenced on an Illumina HiSeq 4000 instrument (PE100 run).

298

299 Preparation of bulk libraries

300 Five 10-days-old *Arabidopsis thaliana* seedlings were collected into 1.5 ml screw cap tubes  
301 with 5 glass beads, precooled in liquid nitrogen. Samples were homogenized by adding one half  
302 of TRI-Reagent (Sigma-Aldrich, 1 ml per 100 mg) to each sample following sample disruption  
303 by using the Precellys 24 Lysis & Homogenization instrument for 30 sec and 4000 rpm. After  
304 homogenization, total RNA was extracted by adding 2<sup>nd</sup> half of TRI-Reagent and the protocol  
305 was proceeded according to the manufacturer. To remove any co-precipitated DNA, a DNase-  
306 I digest was performed by using 1U DNase-I (NEB) in a total volume of 100  $\mu$ l. Total RNA  
307 was cleaned-up by LiCl-precipitation using 10  $\mu$ l 8 M LiCl and 3 vol 100% Ethanol pa  
308 incubating at -20 °C overnight. Following a spin down at 4 °C, 13,000 rpm for 30 min and 2  
309 washing steps with 70% Ethanol pa. The RNA pellet was dried on ice for 1 h and resuspended  
310 in 40  $\mu$ l DEPC-H<sub>2</sub>O incubating at 56 °C for 5 min. Quality of total RNA was analyzed by  
311 Agilent TapeStation using RNA ScreenTape or alternatively by Agilent's Bioanalyser 2100

312 system. Concentration was measured by a Qubit RNA BR Assay Kit (Thermo Fisher  
313 Scientific). One  $\mu\text{g}$  of total-RNA was used for RNA library preparation with Illumina TruSeq®  
314 Stranded mRNA Library Prep, following the protocol according to the manufacturer. Quality  
315 and fragment peak size were checked by Agilent TapeStation using D1000 ScreenTape or  
316 alternatively by Agilent's Bioanalyser 2100 system. Concentration was measured by the Qubit  
317 dsDNA BR Assay Kit (Thermo Fisher Scientific). Three replicates, composed by five seedlings  
318 each, were used separately through the whole procedure. Strand-specific RNA libraries were  
319 prepared using TruSeq Stranded mRNA library preparation procedure and the three replicates  
320 were sequenced on an Illumina NextSeq 500 instrument (PE75 run).

321

### 322 Data pre-processing

323 The overall data analysis workflow is shown in Supplementary Fig. 14. Raw sequencing  
324 files (bcl) were demultiplexed and fastq files were generated using Illumina bcl2fastq software  
325 (v2.20.0). The command-line version of ICELL8 mappa analysis pipeline (demuxer and  
326 analyzer v0.92) was used for the data pre-processing. Mappa\_demuxer assigned the reads to  
327 the cell barcodes present in the well-list file. Read trimming, genome alignment (*Arabidopsis*  
328 *thaliana* reference genome: TAIR10), counting and summarization were performed by  
329 mappa\_analyzer with the default parameters. A report containing the experimental overview  
330 and read statistics for each PN-seq library was created using hanta software from the ICELL8  
331 mappa analysis pipeline (Supplementary Data 1). The gene matrix generated by  
332 mappa\_analyzer was used as input for Seurat v3.

333

### 334 Quality control and data analysis

335 The downstream analysis started by removing the negative and positive controls included in all  
336 Takara Bio's NGS kits. For the seedling samples, R package Seurat v3 was used to filter viable  
337 nuclei, removing genes detected in less than 3 nuclei, nuclei with less than 200 genes, nuclei  
338 with more than 5% of mitochondria and nuclei with more than 5% of chloroplasts. Seurat  
339 *SCTransform* normalization method was performed for each one of the seedling replicates  
340 separately. Data from three seedling replicates were integrated using *PrepSCTIntegration*,  
341 *FindIntegrationAnchors* and *IntegrateData* functions. After running the *RunPCA* (default  
342 parameters), we performed UMAP embedding using *runUMAP* with *dims=1:20*. Clustering  
343 analysis was performed using *FindNeighbors* (default parameters) and *FindClusters* function  
344 with *resolution=0.5*. Differentially expressed genes were found using *FindAllMarkers* function  
345 and "wilcox" test. The sub-clustering analysis of root was performed using the *subset* function

346 and the seedling clusters containing root cells (clusters: 3, 4, 6, 7, 9, 11 and 12; Supplementary  
347 Fig. 6a). *SCTransform* and *RunPCA* were re-run after sub-setting the data and subsequently  
348 *FindAllMarkers* to find the differentially expressed genes across the sub-clusters, with the  
349 “wilcox” test and using the RNA assay (normalized counts). The annotation of the clusters was  
350 based on the top 20 markers of each cluster.

351 For the flower PN-seq dataset (900 nuclei), only genes encoded in the nucleus were used  
352 (32,548 genes). Nuclei with i) less than 10,000 reads, ii) less than 500 genes containing 10  
353 reads, or iii) at least one gene covering more than 10% of the reads of a particular nucleus were  
354 filtered out. In addition, genes with less than 10 reads in at least 15 nuclei were also filtered  
355 out. The filtering step resulted in a dataset containing 856 nuclei and 14,690 genes. Seurat v3  
356 *SCTransform* normalization was applied to the filtered data using all genes as *variable.features*,  
357 and with parameters: *method*="nb", and *min\_cells*=5. We used the *JackStraw* function in Seurat  
358 to estimate the optimal number of PCAs to be used in the analysis (Supplementary Fig. 8b).  
359 After calculating the first 12 PCAs with *RunPCA*, we performed UMAP embedding using  
360 *runUMAP* with parameters *n.neighbors*=10, *min.dist*=.1, *metric*="correlation", and  
361 *umap.method*="umap-learn". Clustering was done with *FindNeighbors* (default parameters),  
362 and *FindClusters* function using the SLM algorithm, *resolution*=1.15, and *n.iter*=100. Markers  
363 genes were found with the function *FindAllMarkers*, using the “wilcox” test and *min.pct*=0.25.  
364 The annotation of the clusters was based on the top 20 markers of each cluster.

365

#### 366 Annotation

367 Annotation of the seedling and flower clusters was based on TraVaDB (Transcriptome  
368 Variation Analysis Database, <http://travadb.org>). TraVaDB is an open-access database based  
369 on RNA-Seq data, which includes 79 samples, each with at least two biological replicates,  
370 corresponding to different developmental stages and parts of roots, leaves, flowers, seeds,  
371 siliques and stems. The top 20 differentially expressed genes of each cluster was used as input  
372 for the analysis with TraVaDB <sup>17</sup>. The complete TraVaDB was downloaded. The heatmaps  
373 showing the tissue types in which genes were found expressed were created using a R script.

374 For the annotation of the root clusters, we developed a function in R (available at  
375 <https://github.com/ramonvidal/punyplatypus>). This function processes the output of Seurat  
376 *FindAllMarkers* and predicts cell-type(s) for each cluster based on the match between the genes  
377 from the input list and the marker genes from a reference list containing one or more single-  
378 cell experiments. An adjusted p-value (by Bonferroni correction for multiple hypothesis testing)  
379 and a PPV (positive predictive value) are calculated for each predicted cell-type. The smaller

380 the p-value the bigger the evidence the genes is a cell-type specific marker. The PPV describes  
381 the performance of the prediction. It represents the proportion of positive results that are truly  
382 positive. High PPV can be interpreted as indicating the accuracy of the prediction. Only  
383 differentially expressed genes with adjusted p-value  $\leq 0.05$  were used as input for the  
384 punyplatypus. The reference list was created using marker genes from recently published  
385 single-cell RNA expression data of the *Arabidopsis* root<sup>5,9</sup>. They are listed in Supplementary  
386 Table 1.

387

#### 388 Reproducibility and correlation

389 To assess technical reproducibility of our protocol, we used MA plots to evaluate the variability  
390 in each pair of seedling replicates. We compared three replicates against one another, resulting  
391 in three comparisons. Pearson's correlation coefficient was calculated across seedling  
392 replicates. The consistency between bulk and PN-seq experiments was investigated through  
393 the comparison between the log<sub>2</sub> mean expression of genes detected in both experiments.  
394 Expression of bulk RNA-seq data was quantified with RSEM<sup>25</sup>. They are listed in  
395 Supplementary Table 3.

396

#### 397 Network analysis

398 GENIE3 was used to infer gene networks starting from the normalized expression data obtained  
399 from Seurat for each cluster independently, using the parameters  $nTrees=1000$ , and using as  
400 regulators the list of DNA binding proteins obtained from TAIR ([www.arabidopsis.org](http://www.arabidopsis.org)). Genes  
401 expressed in less than 33% of the nuclei in a particular cluster were removed. Only the top  
402 10,000 interactions were kept. Gene regulators with less than 10 predicted targets were also  
403 removed. Dynamics of the gene network through anther development were obtained by the  
404 following approach: First, all nuclei were ordered by their estimated developmental pseudotime  
405 using Monocle 3<sup>26</sup> and cluster 0 (meristem/Early anther) as root cluster. Next, gene networks  
406 were estimated with GENIE, as described before, using groups of non-overlapping sets of 50  
407 nuclei that were previously ordered by its developmental pseudotime.

408

#### 409 Generation and Confocal Imaging of Reporter Lines

410 To validate expression specificity of the marker genes from our single cell PN-seq approach,  
411 promoter:NLS-GFP (nuclear localisation signal-green fluorescent protein) reporter lines were  
412 generated. The marker genes for validation were chosen from the pool of cluster specific marker  
413 genes ( $p < 0.05$ ) that were not previously characterized in the literature (unknown marker genes).

414 The genomic promoter region upstream of the ATG and until the closest neighboring gene was  
415 amplified by PCR and introduced into the entry vector pCR8:GW:TOPO by TA cloning  
416 (primers used for PCR are listed in Supplemental Table 4. Afterwards, the LR reactions were  
417 performed with the binary vector pGREEN:GW:NLS-GFP (Smaczniak et al. 2017) to generate  
418 GFP transcriptional fusions to a nuclear-localization signal peptide. All reporter constructs were  
419 transformed into the Col-0 Arabidopsis background, and multiple independent lines per  
420 construct were analyzed under a Zeiss LSM800 laser-scanning confocal microscope. Different  
421 floral organs were dissected and screened for the GFP signal by confocal microscopy under  
422 20× and 63× magnification objectives. Auto-fluorescence from chlorophyll was collected to  
423 give an outline of the flower organs. A 488-nm laser was used to excite GFP and chlorophyll  
424 and emissions were captured using PMTs set at 410–530 nm and 650–700nm. Z-stack screens  
425 were performed for the floral meristem and stigma tissues to give a 3D structure visualization.

426

#### 427 **Data availability**

428 All relevant data have been deposited in EBI ArrayExpress, accession number E-MTAB-9174.

#### 429 **Code availability**

430 R function developed for the annotation of the root clusters is available on Github:

431 <https://github.com/ramonvidal/punyplatypus>).

432

#### 433 **Acknowledgements**

434 The study was supported by the European Commission (FP-7, grant agreement no. 262055,  
435 ESIG, and Horizon 2020, grant agreement no. 824110, EASI-Genomics) (S.S.), and by DFG  
436 grant KA 2720/5-1 (X.X, K.K). We thank Solenne Bourdier and Dijun Chen for support.

437

#### 438 **References**

- 439 1. Fischer, C. *et al.* Signals trigger state-specific transcriptional programs to support  
440 diversity and homeostasis in immune cells. *Sci. Signal.* **12**, 1–17 (2019).
- 441 2. Regev, A. *et al.* The Human Cell Atlas. *Elife* **6**, e27041 (2017).
- 442 3. Rhee, S. Y., Birnbaum, K. D. & Ehrhardt, D. W. Towards Building a Plant Cell Atlas.  
443 *Trends Plant Sci.* **24**, 303–310 (2019).
- 444 4. Efroni, I. & Birnbaum, K. D. The potential of single-cell profiling in plants. *Genome*  
445 *Biol.* **17**, 65 (2016).
- 446 5. Efroni, I., Ip, P.-L., Nawy, T., Mello, A. & Birnbaum, K. D. Quantification of cell  
447 identity from single-cell gene expression profiles. *Genome Biol.* **16**, 9 (2015).
- 448 6. Efroni, I. *et al.* Root Regeneration Triggers an Embryo-like Sequence Guided by  
449 Hormonal Interactions. *Cell* **165**, 1721–1733 (2016).
- 450 7. Zhang, T.-Q., Xu, Z.-G., Shang, G.-D. & Wang, J.-W. A Single-Cell RNA Sequencing

- 451 Profiles the Developmental Landscape of Arabidopsis Root. *Mol. Plant* **12**, 648–660  
452 (2019).
- 453 8. Jean-Baptiste, K. *et al.* Dynamics of gene expression in single root cells of arabidopsis  
454 thaliana. *Plant Cell* **31**, 993–1011 (2019).
- 455 9. Denyer, T. *et al.* Spatiotemporal Developmental Trajectories in the Arabidopsis Root  
456 Revealed Using High-Throughput Resource Spatiotemporal Developmental Trajectories  
457 in the Arabidopsis Root Revealed Using. *Dev. Cell* **48**, 840-852.e5 (2019).
- 458 10. Lake, B. B. *et al.* A comparative strategy for single-nucleus and single-cell  
459 transcriptomes confirms accuracy in predicted cell-type expression from nuclear RNA.  
460 *Sci. Rep.* **7**, 1–8 (2017).
- 461 11. Macaulay, I. C., Ponting, C. P. & Voet, T. Single-Cell Multiomics: Multiple  
462 Measurements from Single Cells. *Trends Genet.* **33**, 155–168 (2017).
- 463 12. Selewa, A. *et al.* Systematic Comparison of High-throughput Single-Cell and Single-  
464 Nucleus Transcriptomes during Cardiomyocyte Differentiation. *Sci. Rep.* **10**, 1–13  
465 (2020).
- 466 13. Ding, J. *et al.* Systematic comparison of single-cell and single-nucleus RNA-sequencing  
467 methods. *Nat. Biotechnol.* **38**, 737–746 (2020).
- 468 14. Satija, R., Farrell, J. A., Gennert, D., Schier, A. F. & Regev, A. Spatial reconstruction of  
469 single-cell gene expression data. *Nat. Biotechnol.* **33**, 495–502 (2015).
- 470 15. Beisang, D. J. *et al.* Single-cell RNA sequencing reveals that lung mesenchymal  
471 progenitor cells in IPF exhibit pathological features early in their differentiation  
472 trajectory. *Sci. Rep.* **10**, 1–12 (2020).
- 473 16. Kharchenko, P. V., Silberstein, L. & Scadden, D. T. Bayesian approach to single-cell  
474 differential expression analysis. *Nat. Methods* **11**, 740–742 (2014).
- 475 17. Klepikova, A. V., Kasianov, A. S., Gerasimov, E. S., Logacheva, M. D. & Penin, A. A.  
476 A high resolution map of the Arabidopsis thaliana developmental transcriptome based  
477 on RNA-seq profiling. *Plant J.* **88**, 1058–1070 (2016).
- 478 18. Smyth, D. R., Bowman, J. L. & Meyerowitz, E. M. Early flower development in  
479 Arabidopsis. *Plant Cell* **2**, 755–767 (1990).
- 480 19. Gómez, J. F., Talle, B. & Wilson, Z. A. Anther and pollen development: A conserved  
481 developmental pathway. *J. Integr. Plant Biol.* **57**, 876–891 (2015).
- 482 20. Huynh-Thu, V. A., Irrthum, A., Wehenkel, L. & Geurts, P. Inferring regulatory networks  
483 from expression data using tree-based methods. *PLoS One* **5**, 1–10 (2010).
- 484 21. Xu, J. *et al.* The ABORTED MICROSPORES regulatory network is required for  
485 postmeiotic male reproductive development in Arabidopsis thaliana. *Plant Cell* **22**, 91–  
486 107 (2010).
- 487 22. Zhu, E. *et al.* The DYT1-interacting proteins bHLH010, bHLH089 and bHLH091 are  
488 redundantly required for Arabidopsis anther development and transcriptome. *Plant J.* **83**,  
489 976–990 (2015).
- 490 23. Shulse, C. N. *et al.* Profiling of Plant Cell Types Resource Profiling of Plant Cell Types.  
491 *CellReports* **27**, 2241-2247.e4 (2019).
- 492 24. Ryu, K. H., Huang, L., Kang, M. & Schiefelbein, J. Single-Cell RNA Sequencing  
493 Resolves Molecular Relationships Among Individual Plant Cells 1 [ OPEN ]. **179**, 1444–  
494 1456 (2019).
- 495 25. Li, B. & Dewey, C. N. RSEM: Accurate transcript quantification from RNA-seq data  
496 with or without a reference genome. *Bioinforma. Impact Accurate Quantif. Proteomic*  
497 *Genet. Anal. Res.* 41–74 (2014) doi:10.1201/b16589.
- 498 26. Trapnell, C. *et al.* The dynamics and regulators of cell fate decisions are revealed by  
499 pseudotemporal ordering of single cells. *Nat. Biotechnol.* **32**, 381–386 (2014).
- 500

## 501 Acknowledgements

502 The study was supported by the European Commission (FP-7, grant agreement no. 262055,  
503 ESGI, and Horizon 2020, grant agreement no. 824110, EASI-Genomics) (S.S.), and by DFG  
504 grant KA 2720/5-1 (X.X, K.K). We thank Solenne Bourdier and Dijun Chen for support.

505

#### 506 **Author information**

507 Conception and design: S.S. and K.K.; Protocol optimization to obtain plant nuclei:  
508 W.Y.,X.X.,C.S., C.B. C.F., and S.S.; Experimental work: X.X. and C.B.; FACS analysis: C.B.;  
509 Library preparation for single-cell and bulk RNA-sequencing: C.B. and C.S.; Nuclei Isolation  
510 and selection by ICELL8 Imaging System: X.X.,C.B. and C.S.; Validation with transgenic lines  
511 and confocal imaging: X.X. and M.Z.; Provision of tools and materials: K.K., M.K. and S.S.  
512 Data analysis: D.Y.S.F. and J.M.M.; R function development: R.V.; Data interpretation:  
513 D.Y.S.F., J.M.M., C.S., K.K. and S.S; Drafting of the manuscript: S.S. and D.Y.S.F.;  
514 Manuscript writing, review and edition: all authors. Funding and supervision: K.K. and S.S.

515

#### 516 **Ethics declarations**

517 The authors declare no competing interests.

518

#### 519 **Figures**

520 Figure 1: Single-nucleus RNA-sequencing. a) Schematic overview of the here-applied  
521 experimental strategy consisting of i) harvest and snap-freeze of plant material, ii) crushing to  
522 small pieces in liquid nitrogen, iii) mechanic disruption in Honda buffer (with a gentleMACS  
523 Dissociator), iv) nuclei release, v) filtering and centrifugation, vi) FACS, vii) nanowell-based  
524 single-nucleus preparation, viii) library preparation and finally ix) sequencing. After nuclei  
525 isolation (FACS) alternative experimental approaches are conceivable to produce sequence  
526 data. b) FACS histogram plots of DAPI fluorescent nuclei from different plants and different  
527 tissue types: *Arabidopsis thaliana* seedlings and flowers, *Petunia hybrid* flowers, *Antirrhinum*  
528 *majus* flowers (snapdragon), *Solanum lycopersicum* (tomato) flowers and leaves are shown  
529 after conventional gating for rough debris exclusion and doublet discrimination. The grey filled  
530 sections represent the gate that was set for sorting. The different tissue types produce different  
531 amount of nucleus-like sized, low DAPI-fluorescent debris that can only be separated from  
532 intact nuclei by gating the high DAPI-fluorescent peaks (Suppl. Fig. 2). c-d) UMAP plots  
533 showing the reproducibility among three independent biological replicates of *Arabidopsis*  
534 *thaliana* seedlings. e) UMAP plot of 2,871 nuclei showing the single-nuclei cluster by identity.

535 f) Barplot showing the proportion of nuclei corresponding to the identified cluster across the  
536 biological replicates.

537

538 Figure 2: Anther development at single-nuclei resolution. a) UMAP plot of the flower PN-seq  
539 data. b) Heatmap showing the expression of the top 20 significant markers genes for each  
540 cluster. c) Gene expression of known anther regulators *AMS*, *bHLH089*, *bHLH090* and  
541 *bHLH010* plotted in the UMAP coordinates. d) Gene network estimated from cluster 15 (early  
542 anther) using GENIE3 (Supplementary Materials and Methods); only top 5,000 interactions  
543 were used, and only TFs with more than 3 targets are shown. e) Heatmap showing the strength  
544 of the interaction between *AMS* and its target obtained by GENIE3 across overlapping sets of  
545 50 cells from anther clusters ordered by pseudotime; T1 is the first 50 cells (cluster 0,  
546 meristem/early anthers), and T37 is the latest stage (cluster 3, late anther).

547

## 548 **Supplementary Information**

### 549 **Supplementary Figures**

550 Suppl. Fig. 1: Effect of protoplast isolation (PI) on root scRNA-seq. a) Expression correlation  
551 of each cell from scRNA-seq with bulk RNA-seq sample using PI and with bulk RNA-seq  
552 sample without using PI (y and x-axis, respectively; Denyer *et al.* data <sup>9</sup>). Cells have different  
553 response to protoplasting, with some groups of cells being more sensitive to protoplasting  
554 (higher correlation with PI data than with data from intact tissues) than others. b) Re-analysis  
555 of scRNA-seq full data and c) re-analysis of scRNA-seq data removing the top 6,000 PI-  
556 responsive genes (Denyer *et al.* data <sup>9</sup>) from the clustering step. In b) and c), the left UMAP  
557 plots show the cell clusters of scRNA-seq data; the UMAP plots in the center show the  
558 difference between the correlation of each cell from scRNA-seq with bulk RNA-seq PI and  
559 non-PI samples. Thus, positive correlation numbers indicates cells with stronger similarity to  
560 the transcriptome of PI samples. The violin plots in the right show the difference in the  
561 correlation of cells between PI and non-PI, per cluster. When no PI-responsive genes were  
562 removed (b) we observed several clusters containing cells with strong response to PI, with the  
563 most extreme cluster with up to 55% of the top 20 marker genes being PI-responsive genes.  
564 This effect largely persisted when PI-responsive genes were excluded from the primary scRNA-  
565 seq analysis. After the exclusion of PI-responsive genes from the clustering step, but still using  
566 them to identify markers, we observed the most extreme cluster with up to 46% of the top 20  
567 marker genes being PI-responsive genes (c). These results highlight a need for alternative  
568 methods beyond PI for plant single-cell genomics.



569

570 Suppl. Fig. 2: Generic single-nuclei isolation procedure. a) Microscopy analysis. Sections from  
571 disposable Neubauer counting chambers with DAPI stained nuclei after FACS from  
572 *Arabidopsis thaliana* seedlings and flowers, *Petunia hybrid* flowers, *Antirrhinum majus* flowers  
573 (snapdragon), *Solanum lycopersicum* (tomato) flowers and leaves. The brightfield images are  
574 overlain with the blue fluorescence images. Images of *Arabidopsis thaliana* samples were  
575 captured with a DMI8 microscope by Leica and the others by a BZ-X700 Series microscope by  
576 Keyence. The images show that FACS yields clean, debris-free nuclei suspensions irrespective  
577 of the initial amount of debris. b) Contour plots of flow cytometry experiments. c) Gating  
578 strategy used for flow cytometry, exemplified for *Arabidopsis thaliana* flower (inflorescence)  
579 samples. d) Quality control of RNA nuclei samples through chromatography-based analysis  
580 of RNA derived from pooled nuclei of *Arabidopsis thaliana* seedlings and RNA derived from  
581 conventional purification (RIN = RNA Integrity Number). B1 corresponds to bulk RNA from  
582 tissue and C1 corresponds to RNA from sorted nuclei.

583

584 Suppl. Fig. 3: Summary of PN-seq seedling datasets. Violin plots showing the total number of  
585 detected genes (nFeature), reads counts (nCount), proportion of mitochondria (percent.mt) and  
586 chloroplast (percent.ch) contamination per nucleus for each replicate.

587

588 Suppl. Fig. 4: Correlation among PN-seq replicates and between PN-seq and bulk RNA-seq  
589 libraries. a) MA-plot showing the differences between samples: Replicate 1 versus Replicate 2,  
590 Replicate 1 versus Replicate 3 and Replicate 2 versus Replicate 3, plotted against the average  
591 gene count value (A). The red line shows the average differences. b) Scatterplot of gene  
592 expression obtained by different PN-seq replicates. c) Scatterplot of gene expression obtained  
593 by pooling the three PN-seq replicates against the bulk RNA-seq. Read counts from both  
594 datasets, PN-seq and bulk RNA-seq, were log<sub>2</sub> transformed.

595

596 Suppl. Fig. 5: Comparison of bulk-RNA and PN-seq data indicates no expression bias of  
597 specific gene groups. Expression of top 25% genes with highest variance between bulk (red  
598 boxes) and PN-seq (green boxes) experiments. *A. thaliana* chromosomes are shown on the x-  
599 axis and the log<sub>2</sub> mean expression of the genes in 3 replicates are shown on the y-axis. The  
600 thick line in the middle of the box represents 50% of observations, with the lower end of the  
601 box at 25% and the upper end of the box at 75%.

602

603 Suppl. Fig. 6: Annotation of seedling cell-clusters using TraVaDB dataset. a) UMAP plot of  
604 2,871 nuclei organized in 13 clusters before the annotation. b) Heatmaps of the 13 clusters  
605 showing the expression level of the top 20 differentially expressed genes from each cluster in  
606 the TraVaDB dataset. c) Illustration of the cluster annotation process.

607

608 Suppl. Fig. 7: Single-nuclei transcriptome analysis of a subset of root cells derived from  
609 seedling data. a) UMAP of 15 clusters (n=964 nuclei). Eight clusters were faithfully annotated  
610 using punyplatypus function: cluster 0 - mature (p-value=7.785874e-04, PPV=0.55), cluster 1  
611 - endodermis (p-value=1.550274e-13, PPV=0.86), cluster 1 - cortex (p-value=1.689028e-10,  
612 PPV=0.71), cluster 4 - stele (p-value=8.827076e-12, PPV=0.90), cluster 9 - mature (p-  
613 value=5.837800e-10, PPV=1.0, cluster 10 - trichoblast (p-value=1.655356e-92, PPV=0.90),  
614 cluster 11 - trichoblast (p-value=3.641153e-11, PPV=0.47), cluster 12 - endodermis (p-  
615 value=2.486261e-05, PPV=0.54) and cluster 14 - xylem (p-value=8.777430e-37, PPV=0.94).  
616 Punyplatypus calculates a p-value and PPV per cell type, which indicate the performance of  
617 annotation. The smaller the p-value the bigger the evidence that the genes are cell-type specific  
618 markers. High PPV can be interpreted as indicating the proportion of genes in a cluster found  
619 annotated with the same cell type in the reference list. b) Violin plots showing expression of  
620 marker genes per annotated cluster. c) Heatmap corroborating the annotation by punyplatypus.  
621 It shows the top 100 markers of Denyer *et al.*<sup>9</sup> among the top 1000 expressed genes per nuclei  
622 of PN-seq. Almost all cell types could be recovered using a subset of root nuclei from the  
623 complex seedling data.

624 Suppl. Fig. 8: Correlation between unfixed and fixed seedling samples. a) UMAP plot showing  
625 similar cell distribution of unfixed and fixed seedling samples. b) UMAP plot showing the  
626 overlapping between cells from unfixed and fixed seedling samples. c) Pearson's correlation  
627 coefficient across unfixed and fixed seedling samples. The thick line in the middle of the box  
628 represents 50% of observations (log<sub>2</sub> of read counts), with the lower end of the box at 25% and  
629 the upper end of the box at 75%. Bars extend to the lowest and highest values that are not  
630 outliers. The correlation found over all samples was 0.90.

631

632 Suppl. Fig. 9: Single-nuclei transcriptome analysis of *Arabidopsis thaliana* flower  
633 development. a) Number of genes per nuclei (nFeature) and number of reads per gene (nCount).  
634 b) JACKSTRAW plot to identify the optimal number of PCAs for the analysis of the  
635 inflorescence dataset. c) Annotation of clusters based on correlation: the average gene  
636 expression of each cluster was Spearman correlated against each one of the TraVaDB

637 transcriptome dataset considered. The two labels plotted on top of each cluster indicate the two  
638 TraVa samples with highest correlation.

639

640 Suppl. Fig. 10: Temporal trajectories in the floral PN-seq dataset. a) Annotation of clusters  
641 based on correlation with the “stages” samples in the TraVa dataset. b and c) Pseudotime  
642 analysis using Monocle 3. d) Flower developmental stages recovered from the TraVa dataset.

643

644 Suppl. Fig. 11: Main master regulators in flower cells. GENIE3 was used to estimate the gene  
645 network of each cluster. The heatmap shows the number of predicted target genes for each TF  
646 among the top 10,000 strongest interaction in the network. Only the top 4 TFs with most  
647 predicted target genes per cluster are shown.

648

649 Suppl. Fig. 12: Novel marker genes covering the developmental trajectory of anther/pollen  
650 development.

651

652 Suppl. Fig. 13: a) Summary of functional validation. Clearly visually validated genes are  
653 indicated by green dots, whereas grey dots indicate negative results. b) Validation for cluster-  
654 specific genes with transcriptional reporter lines. Expression patterns of reporter lines for the  
655 following genes reveal the predicted floral organ specificities: (a) AT1G63100, floral meristem;  
656 (b) AT3G51740, floral meristem; (c) AT4G11290, stigma; (d) AT2G38995, sepal; (e)  
657 AT2G38995, petal; (f) AT2G38995, anther. Expression patterns of reporter lines for the  
658 following genes reveal the predicted stage specificities for anther development: (g)  
659 AT5G20030, flower 11-13; (h) AT1G23520, flower 6-8; (i) AT2G16750, flower 4-5. White  
660 arrowheads indicate GFP signals in nuclei;. Scale bars, 50  $\mu$ m.

661

662 Suppl. Fig. 14: PN-seq data analysis pipeline. Blue boxes represent the main analysis steps, the  
663 software used in each step is shown in *italic* and the steps using *mappa* analysis pipeline are  
664 shown in the dashed gray box. The in/output files from each step of analysis are represented  
665 with file icons.

666

667 Supplementary Tables:

668 Suppl. Table 1: List of marker genes in *Arabidopsis thaliana* seedlings, roots and flowers.

669 Suppl. Table 2: Program steps for gentle tissue disruption and nuclei release on the  
670 gentleMACS Dissociator and the instrument specific commands. The instrument specific tubes

671 have got a stator and rotor. Latter can be moved at certain a certain speed (rpm = rounds per  
672 minute) for a certain time (time in s) in several rounds (loops).

673 Suppl. Table 3: Sequencing data metrics and read counts of PN-seq and bulk RNA-seq libraries.

674

675 Supplementary Data:

676 Suppl. Data 1: Summary and read statistics of the PN-seq data (adapted from the html reports  
677 generated by ICELL8 hanta software)

678

679

680

681

682

683

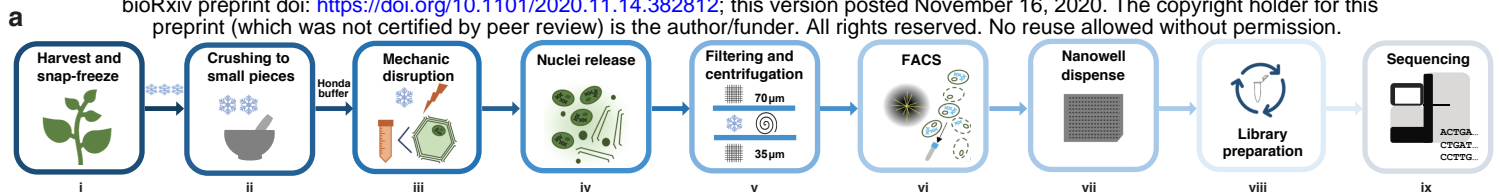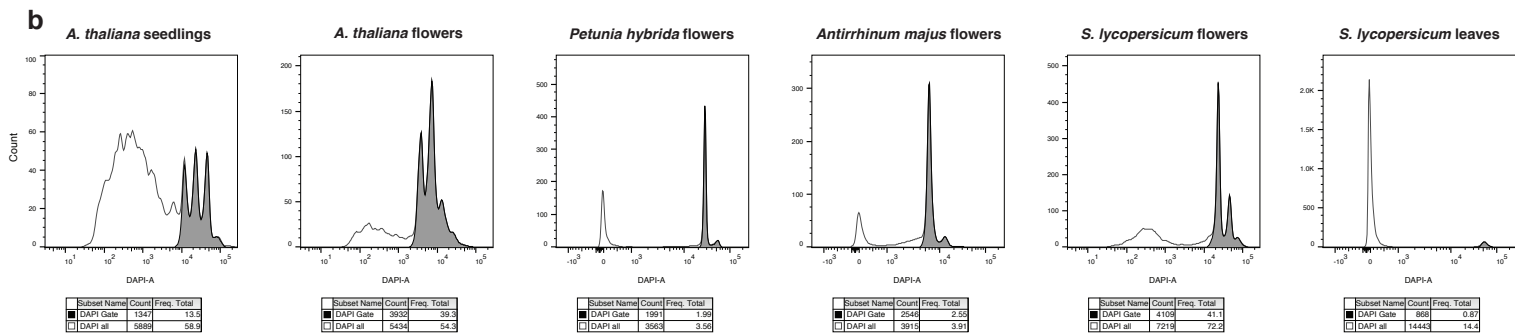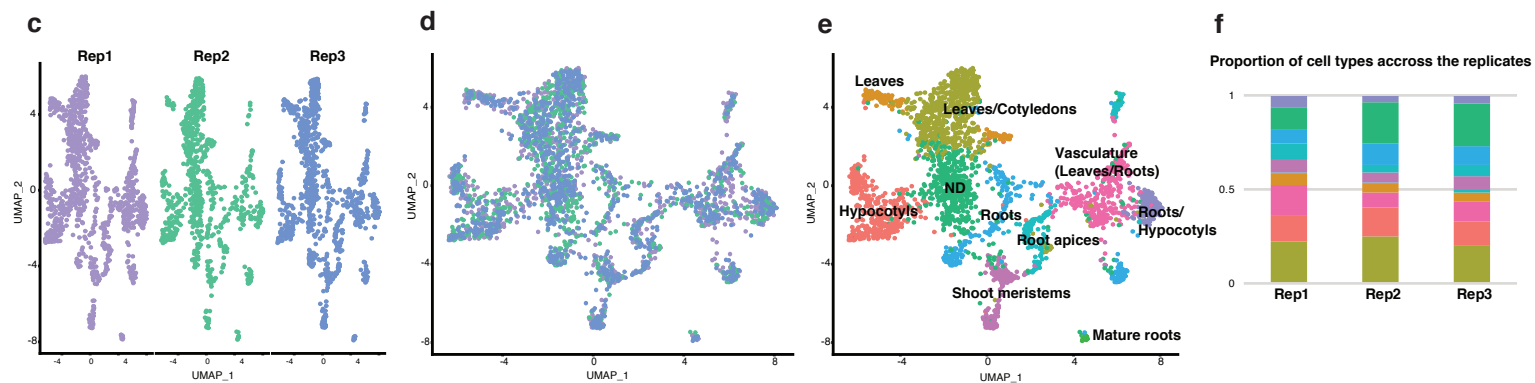

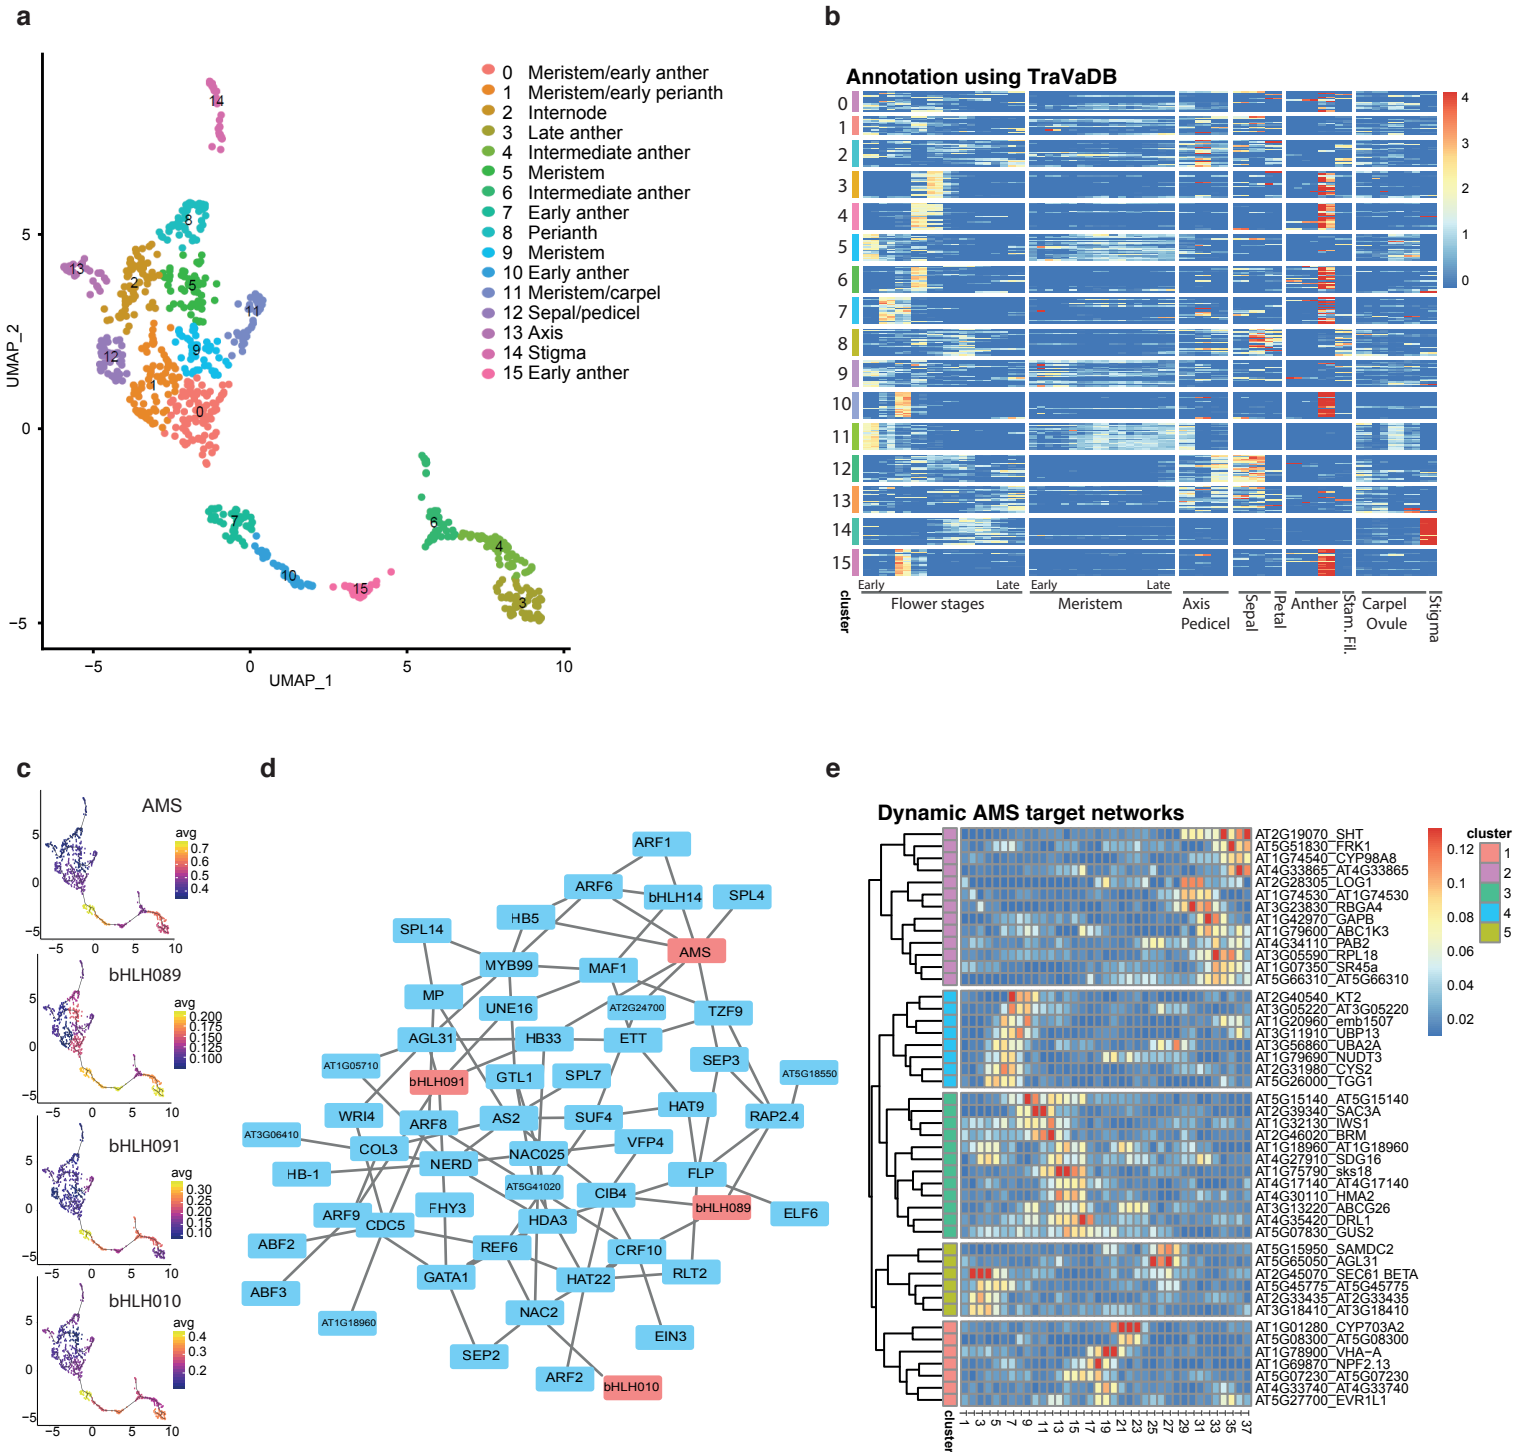

Source: https://www.biorxiv.org/content/biorxiv/early/2020/11/16/2020.11.14.382812.full.pdf
